# Supplementary material for: Nano-building block based-hybrid organic–inorganic copolymers with self-healing properties
Source: Royal Society of Chemistry journal article supplement (doi:10.1039/c4py00172a), 2014-01-01
Supplement: c4py00172a1.pdf [file c4py00172a1.pdf]

Supplementary Information:

## Nano-Building Blocks based-Hybrid organic-inorganic copolymers with Self-Healing Properties.

F. Potier,<sup>a,b,c</sup> A. Guinault,<sup>d</sup> S. Delalande,<sup>e</sup> C. Sanchez,<sup>a,b,c</sup> F. Ribot<sup>a,b,c</sup> and L. Rozes<sup>a,b,c</sup> \*

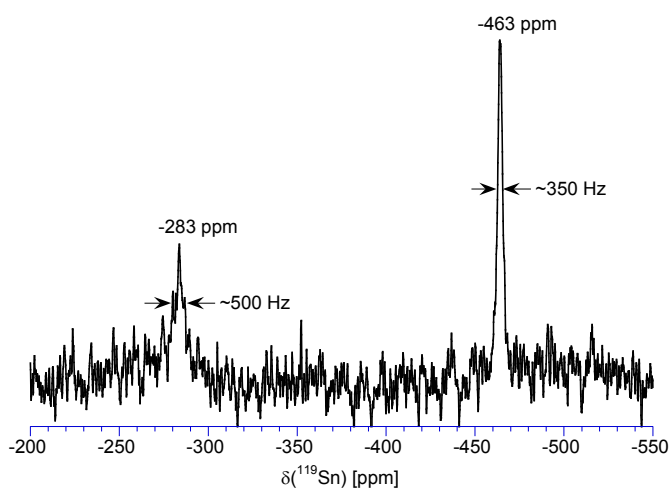

**Figure S11.**  $^{119}\text{Sn}$ -( $^1\text{H}$ ) NMR spectrum (111.9 MHz) of a piece of poly(n-butyl acrylate-co-[(BuSn) $_{12}$ O $_{14}$ (OH) $_6$ ](AMPS) $_2$ ) swollen by  $\text{CDCl}_3$ . Despite the recording of 32768 transients ( $\sim 2\text{h}20''$ ), the signal to noise ratio remains low because of the very low amount of tin oxo-cluster, ca. 3 mg, in the observed volume of the 5 mm tube.
